# Supplementary material for: Strategic Deployment of Cardiology Fellows in Training Using the Accreditation Council for Graduate Medical Education Coronavirus Disease 2019 Framework
Source: PubMed Central journal article supplement — J Am Heart Assoc. 2020 Jul 14;9(14):e017443. doi: 10.1161/JAHA.120.017443 (PMC7660705; doi:10.1161/jaha.120.017443), 2020-07-14
Supplement: JAH3-9-e017443-s001.pdf [file JAH3-9-e017443-s001.pdf]

# **Supplemental Material**

**Table S1. Resources for FIT for a variety of subjects pertaining to COVID-19 crisis.**

| <b>Category</b> | <b>Description</b>                                                                                       | <b>Citation/Link</b>                                                                                                                                                                                                                                                                                                              |
|-----------------|----------------------------------------------------------------------------------------------------------|-----------------------------------------------------------------------------------------------------------------------------------------------------------------------------------------------------------------------------------------------------------------------------------------------------------------------------------|
| General         | ACC: Fellows-in-Training & Early Career Section Perspectives; effect of COVID-19 on education & training | <a href="https://www.acc.org/latest-in-cardiology/features/accs-coronavirus-disease-2019-covid-19-hub/fit-ec-perspectives">https://www.acc.org/latest-in-cardiology/features/accs-coronavirus-disease-2019-covid-19-hub/fit-ec-perspectives</a>                                                                                   |
|                 | Clinical guidelines on cardiac care of COVID-19 patients                                                 | <a href="https://covidprotocols.org/protocols/06-cardiology">https://covidprotocols.org/protocols/06-cardiology</a>                                                                                                                                                                                                               |
|                 | ACC Hub for clinical guidance, webinars, perspectives, updates                                           | <a href="https://www.acc.org/covid19">https://www.acc.org/covid19</a>                                                                                                                                                                                                                                                             |
|                 | TCT Hub for news, podcasts, opinions                                                                     | <a href="https://www.tctmd.com/COVID19">https://www.tctmd.com/COVID19</a>                                                                                                                                                                                                                                                         |
|                 | SCAI Hub for COVID-19 issues                                                                             | <a href="http://www.scai.org/covid-19-resources">http://www.scai.org/covid-19-resources</a>                                                                                                                                                                                                                                       |
|                 | ESC Hub for podcasts, insights, resources                                                                | <a href="https://www.escardio.org/Education/COVID-19-and-Cardiology">https://www.escardio.org/Education/COVID-19-and-Cardiology</a>                                                                                                                                                                                               |
|                 | WHO Hub for public & provider updates                                                                    | <a href="https://www.who.int/emergencies/diseases/novel-coronavirus-2019">https://www.who.int/emergencies/diseases/novel-coronavirus-2019</a>                                                                                                                                                                                     |
| Provider Safety | CDC Recommendations for PPE                                                                              | <a href="https://www.cdc.gov/coronavirus/2019-ncov/hcp/using-ppe.html">https://www.cdc.gov/coronavirus/2019-ncov/hcp/using-ppe.html</a>                                                                                                                                                                                           |
|                 | Protecting cardiologists-lessons from Wuhan, China                                                       | <a href="https://www.escardio.org/Education/COVID-19-and-Cardiology/protecting-cardiologists-during-the-covid-19-epidemic-lessons-from-wuhan">https://www.escardio.org/Education/COVID-19-and-Cardiology/protecting-cardiologists-during-the-covid-19-epidemic-lessons-from-wuhan</a>                                             |
|                 | Supporting the Health Care Workforce PPE, hospital policies, family safety                               | <a href="http://jamanetwork.com/article.aspx?doi=10.1001/jama.2020.3972">http://jamanetwork.com/article.aspx?doi=10.1001/jama.2020.3972</a>                                                                                                                                                                                       |
|                 | ASE Statement on Protection of Patients & Echocardiography Service Providers                             | <a href="https://doi.org/10.1016/j.jacc.2020.04.002">https://doi.org/10.1016/j.jacc.2020.04.002</a>                                                                                                                                                                                                                               |
| Mental Health   | Coronavirus and Mental Health: Taking Care of Ourselves During Infectious Disease Outbreaks              | <a href="https://www.psychiatry.org/newsroom/apa-blogs/apa-blog/2020/02/coronavirus-and-mental-health-taking-care-of-ourselves-during-infectious-disease-outbreaks">https://www.psychiatry.org/newsroom/apa-blogs/apa-blog/2020/02/coronavirus-and-mental-health-taking-care-of-ourselves-during-infectious-disease-outbreaks</a> |
|                 | Podcast on anxiety, stress, PTSD related to pandemics                                                    | <a href="https://www.apa.org/research/action/speaking-of-psychology/coronavirus-anxiety">https://www.apa.org/research/action/speaking-of-psychology/coronavirus-anxiety</a>                                                                                                                                                       |
|                 | CDC: COVID-19 Stress and Coping                                                                          | <a href="https://www.cdc.gov/coronavirus/2019-ncov/daily-life-coping/managing-stress-anxiety.html?CDC_AA_refVal=https%3A%2F%2Fwww.cdc.gov%2Fcoronavirus%2F2019-">https://www.cdc.gov/coronavirus/2019-ncov/daily-life-coping/managing-stress-anxiety.html?CDC_AA_refVal=https%3A%2F%2Fwww.cdc.gov%2Fcoronavirus%2F2019-</a>       |

|                           |                                                                                               |                                                                                                                                                                                                             |
|---------------------------|-----------------------------------------------------------------------------------------------|-------------------------------------------------------------------------------------------------------------------------------------------------------------------------------------------------------------|
|                           |                                                                                               | ncov%2Fprepare%2Fmanaging-stress-anxiety.html                                                                                                                                                               |
| Family Health             | CDC: Helping Children Cope with Emergencies                                                   | <a href="https://www.cdc.gov/childrenindisasters/helping-children-cope.html">https://www.cdc.gov/childrenindisasters/helping-children-cope.html</a>                                                         |
|                           | CSTS: recommendations on family protection                                                    | <a href="https://www.cstonline.org/assets/media/documents/CSTS_FS_Corona_Taking_Care_of_Your_Family.pdf">https://www.cstonline.org/assets/media/documents/CSTS_FS_Corona_Taking_Care_of_Your_Family.pdf</a> |
| Adapting Delivery of Care | Telemedicine: The Essentials                                                                  | <a href="https://www.cfp.ca/sites/default/files/pubfiles/PDF%20Documents/Blog/telehealth_tool_eng.pdf">https://www.cfp.ca/sites/default/files/pubfiles/PDF%20Documents/Blog/telehealth_tool_eng.pdf</a>     |
|                           | The role of cardiac point of care ultrasound                                                  | <a href="https://doi.org/10.1016/j.echo.2020.04.004">https://doi.org/10.1016/j.echo.2020.04.004</a>                                                                                                         |
|                           | SCCT Recommendations for cardiac CT                                                           | <a href="https://doi.org/10.1016/j.jcct.2020.03.002">https://doi.org/10.1016/j.jcct.2020.03.002</a>                                                                                                         |
|                           | HRS, ACC, AHA recommendations on care of the EP patient                                       | <a href="https://doi.org/10.1016/j.hrthm.2020.03.028">https://doi.org/10.1016/j.hrthm.2020.03.028</a>                                                                                                       |
| Adapting Education        | Implementing experiential learning, telemedicine, virtual education, and social media for FIT | <a href="https://dx.doi.org/10.1016%2Fj.jacc.2020.04.013">https://dx.doi.org/10.1016%2Fj.jacc.2020.04.013</a>                                                                                               |
| Patient Management        | Review of the basics of ARDS and mechanical ventilation for FIT.                              | <a href="https://doi.org/10.1016/j.jaccas.2020.03.007">https://doi.org/10.1016/j.jaccas.2020.03.007</a>                                                                                                     |
|                           | Video series, tips on mechanical ventilation                                                  | <a href="https://www.aarc.org/resources/clinical-resources/pandemic-ventilation-video-series-covid-19/">https://www.aarc.org/resources/clinical-resources/pandemic-ventilation-video-series-covid-19/</a>   |
|                           | Physiology of mechanical ventilation (Part 1).                                                | <a href="https://doi.org/10.12968/hmed.2018.79.12.C188">https://doi.org/10.12968/hmed.2018.79.12.C188</a>                                                                                                   |
|                           | Practical considerations and case-based tips of mechanical ventilation (Part 2)               | <a href="https://doi.org/10.12968/hmed.2019.80.1.C12">https://doi.org/10.12968/hmed.2019.80.1.C12</a>                                                                                                       |
|                           | Measurement of the QT interval                                                                | <a href="https://dx.doi.org/10.2174%2F1573403X10666140514103612">https://dx.doi.org/10.2174%2F1573403X10666140514103612</a>                                                                                 |

FIT= fellows-in-training, COVID-19= coronavirus 2019, ACC= American College of Cardiology, TCT= Transcatheter Cardiovascular Therapeutics, SCAI= Society for Cardiovascular Angiography and Interventions, WHO= World Health Organization, ESC= European Society of Cardiology, CDC= Centers for Disease Control, PPE= personal protection equipment, ASE= American Society of Echocardiography, PTSD= post-traumatic stress disorder, CSTS= Center for the Study of Traumatic Stress, SCCT= Society for Cardiovascular Computed Tomography, HRS= Heart Rhythm Society, AHA= American Heart Association, ARDS= adult respiratory distress syndrome, EP= electrophysiology

**Figure S1. ACGME Pandemic Emergency Status Declaration Form.**

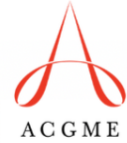

**Pandemic Emergency Status Declaration Form**

Email completed and signed forms to [dio@acgme.org](mailto:dio@acgme.org). The ACGME will contact the designated institutional official (DIO) with any questions and will send confirmation of Pandemic Emergency Status declaration to the DIO and institutional coordinator.

1. Sponsoring Institution Name

2. ACGME 10-Digit ID

3. Designated Institutional Official Name

4. Pandemic Emergency Status Requested Start Date

5. What is the term of the Sponsoring Institution's declaration of Pandemic Emergency Status?  
 30-day declaration       Other end date (less than 30 days only) \_\_\_\_\_

6. The Sponsoring Institution may exempt programs from this declaration only if those exempted programs have no participating sites in common with other programs that are subject to this declaration. If the Sponsoring Institution wishes to exempt programs from this declaration, list the programs to be exempted and their participating sites. Add rows as needed.

| Specialty/Subspecialty | ACGME ID | Participating Site(s) |
|------------------------|----------|-----------------------|
|                        |          |                       |
|                        |          |                       |

By signing the Pandemic Emergency Status Declaration Form, the designated institutional official:

- requests that the Sponsoring Institution and its ACGME-accredited program(s) be granted Pandemic Emergency Status through the ACGME's Extraordinary Circumstances policy;
- attests that this request for Pandemic Emergency Status has been approved by the clinical leadership of the primary clinical site(s) of the Sponsoring Institution's accredited program(s);
- attests that all voting members of the Sponsoring Institution's Graduate Medical Education Committee have been informed in writing of this request; and,
- attests that the Sponsoring Institution will ensure that its ACGME-accredited programs are compliant with specified ACGME Common Program Requirements that protect residents/fellows, health care teams, and patients throughout the term of the Pandemic Emergency Status declaration.

\_\_\_\_\_  
 Designated Institutional Official Signature

\_\_\_\_\_  
 Date

**Figure S2. Beaumont Health guidelines for the management of COVID-19 patients with acute coronary syndromes.**

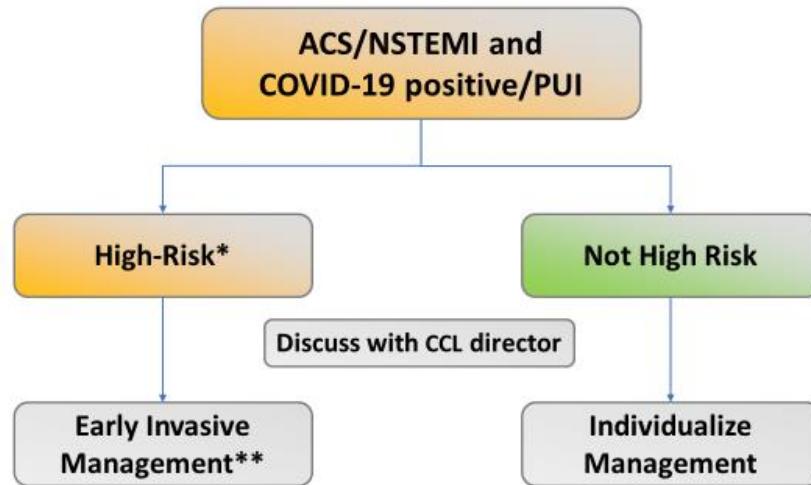

ACS= acute coronary syndromes, NSTEMI= non-ST-segment elevation myocardial infarction,  
PUI= patient under investigation, CCL= cardiac catheterization laboratory.

\*High-risk features include refractory angina, hemodynamic or electrical instability, and acute heart failure

\*\*Early hospital discharge is recommended if possible

**Figure S3. Beaumont Health guidelines for the management of COVID-19 patients with STEMI.**

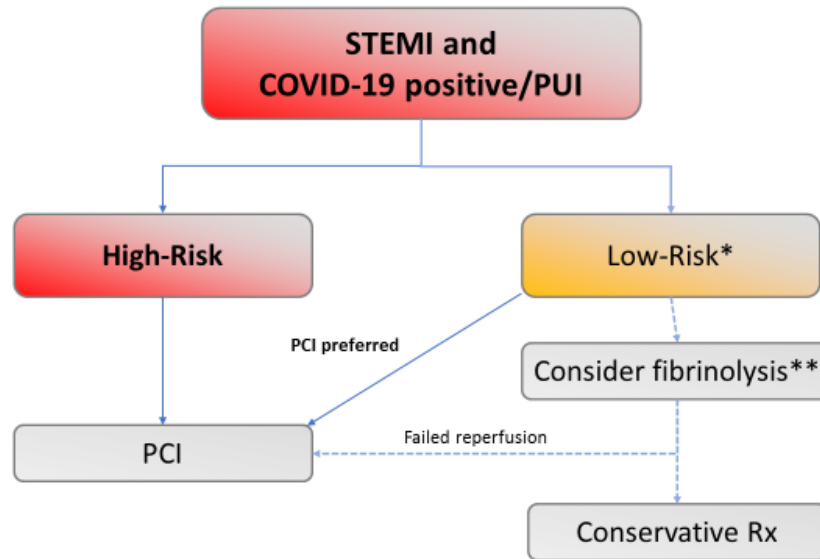

STEMI= ST-segment elevation myocardial infarction, PUI= patient under investigation, PCI= percutaneous coronary intervention.

\*Low-risk features include hemodynamic stability and inferior STEMI. Early discharge may be considered in patients with successful PCI, single vessel disease, ejection fraction > 50%, and absence of complications.

\*\*Tenecteplase (Genentech, Inc, South San Francisco, CA) is the preferred agent for thrombolysis.

**Figure S4. Beaumont Health guidelines for the management of COVID-19 patients with cardiogenic shock.**

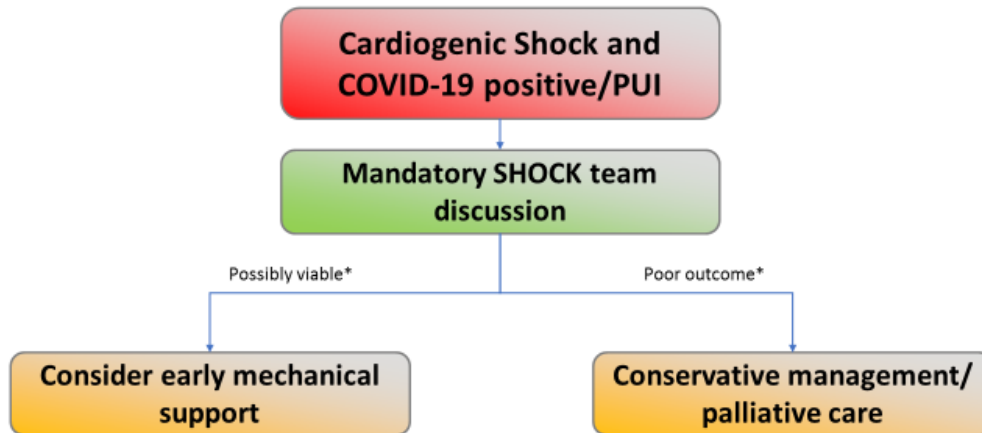

\*Careful consideration is required before initiating mechanical support, that relies on immediate mandatory discussion with our institutional multidisciplinary SHOCK team. Considerations include age (no absolute cutoff), the presence of serious comorbidities (disseminated intravascular coagulopathy, renal failure, ventilator-dependent respiratory failure, multi-organ system failure), and the presence of adverse markers of inflammation and acidosis (lactate, pH, ferritin, c-reactive protein, interleukin-6, erythrocyte sedimentation rate, procalcitonin). PUI= patient under investigation.
